# Supplementary material for: Magnetic particle imaging enables nonradioactive quantitative sentinel lymph node identification: feasibility proof in murine models
Source: PubMed Central journal article supplement — Radiol Adv. 2024 Oct 25;1(3):umae024. doi: 10.1093/radadv/umae024 (PMC11576474; doi:10.1093/radadv/umae024), 2024-10-25
Supplement: umae024_supplementary_data.pdf [file umae024_supplementary_data.pdf]

# Magnetic particle imaging enables non-radioactive quantitative sentinel lymph node identification: feasibility proof in murine models

Olivia C. Sehl<sup>1,2\*</sup>, Kelvin Guo<sup>1</sup>, A. Rahman Mohtasebzadeh<sup>1</sup>, Petrina Kim<sup>1</sup>, Benjamin Fellows<sup>1</sup>, Marcela Weyhmler<sup>1</sup>, Patrick W. Goodwill<sup>1</sup>, Max Wintermark<sup>3</sup>, Stephen Y. Lai<sup>4</sup>, Paula J. Foster<sup>2</sup>, Joan M. Greve<sup>1</sup>

<sup>1</sup>Magnetic Insight Inc, 2020 N Loop Rd, Alameda CA-94502

<sup>2</sup>Department of Medical Biophysics, University of Western Ontario, Robarts Research Institute, 1151 Richmond St, London ON, N6A 3K7

<sup>3</sup>Department of Neuroradiology, University of Texas MD Anderson Cancer Center, 1515 Holcombe Blvd, Houston TX-77030

<sup>4</sup>Department of Head and Neck Surgery, University of Texas MD Anderson Cancer Center, 1515 Holcombe Blvd, Houston TX-77030

\*Corresponding Author

Olivia C. Sehl, PhD

Magnetic Insight Inc.

2020 N Loop Rd.

Alameda, CA 94502

[osehl@magneticinsight.com](mailto:osehl@magneticinsight.com)

Supplementary Figures:

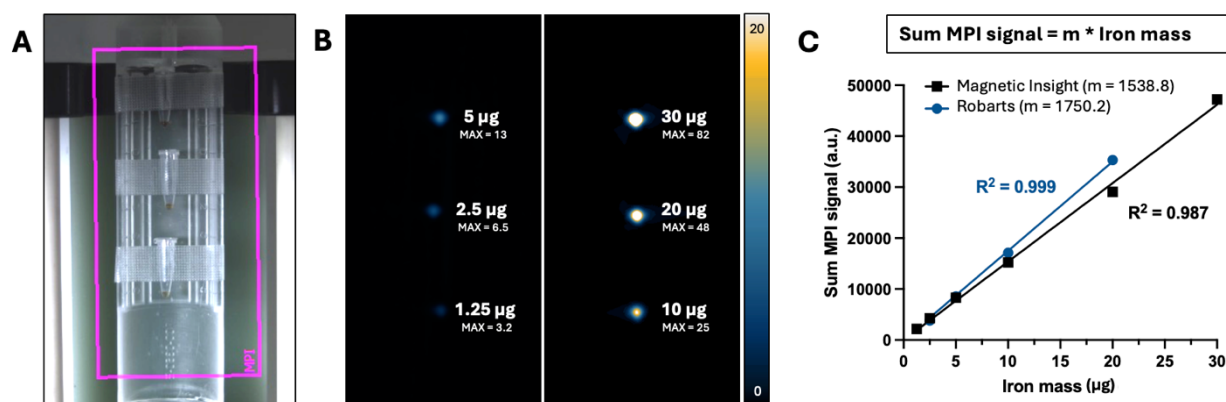

**Supplementary Figure S1. MPI image calibration to determine the relationship between MPI signal and iron mass.** **A.** Three iron samples (VivoTrax) were placed with equal spacing within a 12 x 6 x 6 cm field of view. **B.** Two 3D acquisitions were performed to image six samples of iron, with iron mass ranging from 1.25 – 30 µg Fe (Magnetic Insight) or 2.5 – 20 µg Fe (Robarts). MPI signal maximum intensities are labeled and images are displayed from 0-20 a.u. **C.** The sum MPI signal from each sample was directly linear with the amount of iron ( $R^2 > 0.998$ ). The linear equation for the calibration curve is subsequently used to quantify the amount of iron from *in vivo* images, where  $m$  is the slope of the line which is a unique value for each MPI instrument and set of imaging parameters.

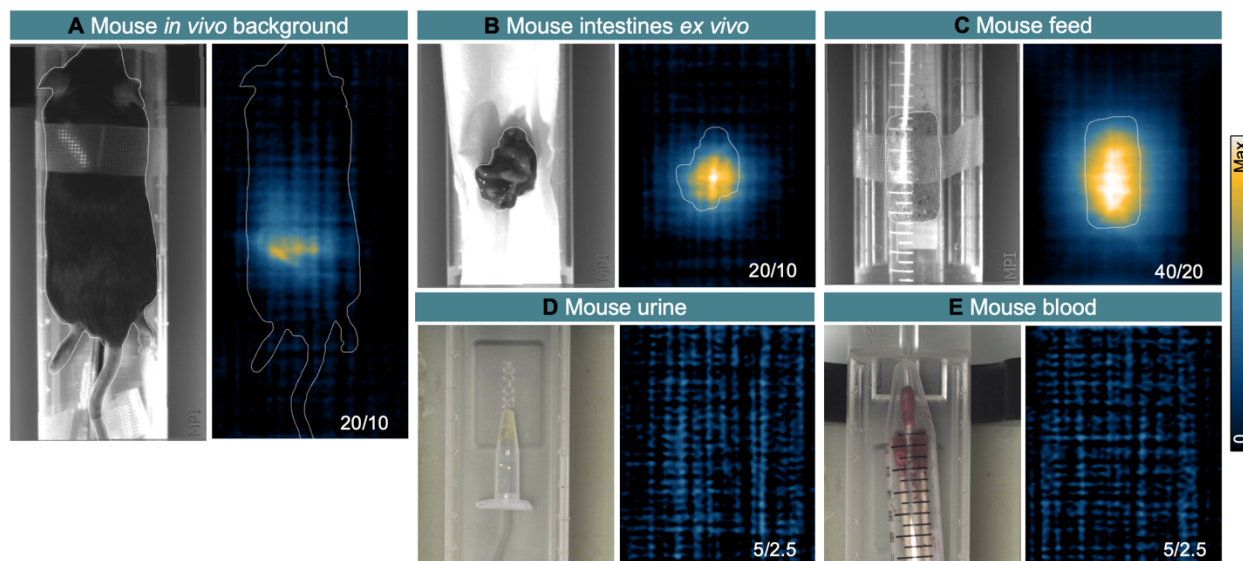

**Supplementary Figure S2. (A)** Mouse with no iron tracer administered shows low intensity background MPI signal. **B.** Excised mouse intestines show MPI signal. **C.** MPI signal is also detected from mouse feed. No MPI signal is detected from mouse **(D)** urine (50 µL) or **(E)** fresh blood. The window/level for each image is indicated (au).

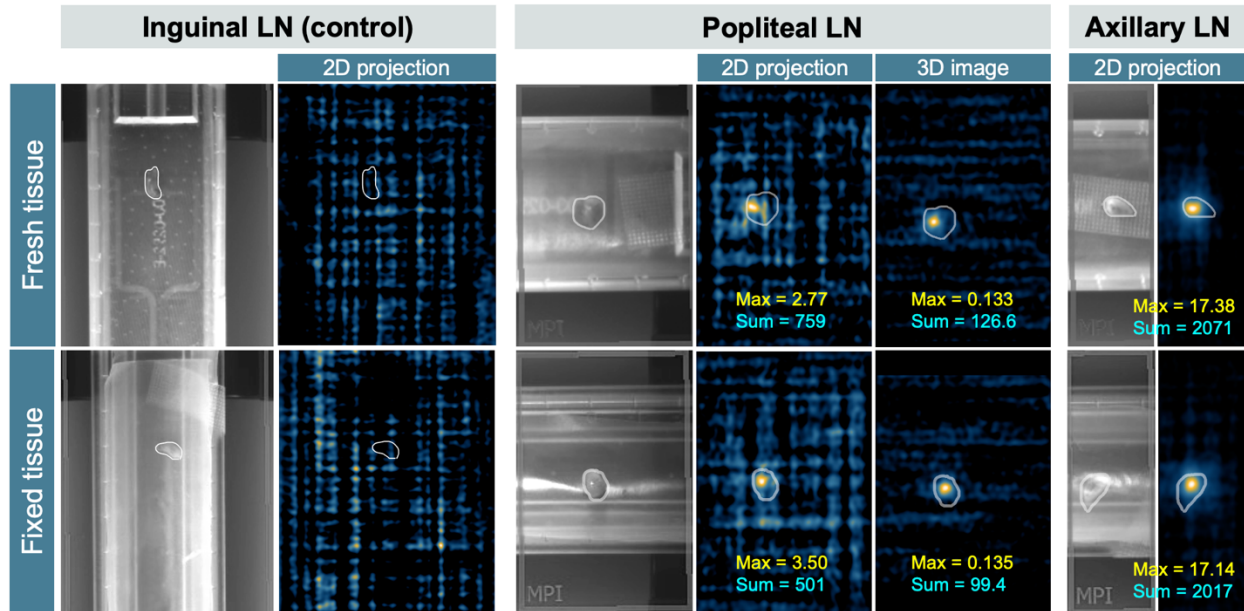

**Supplementary Figure S3. Comparison of MPI signals from freshly-excised vs. fixed tissues.** **A.** Control inguinal LN shows no measurable MPI signal in a single projection image, pre- and post-fixation in 4% paraformaldehyde. **B.** Popliteal LN collected from C57 mouse that received VivoTrax intradermally to footpad. MPI signals were similar pre- and post-fixation when imaged in 2D (1 projection) and 3D (35 projections). **C.** Axillary LN collected from C57 mouse that received VivoTrax intradermally to forepaw. MPI signals were similar pre- and post-fixation when imaged by MPI as a 2D projection.
